# Supplementary material for: A Small Molecule Glycosaminoglycan Mimetic Blocks Plasmodium Invasion of the Mosquito Midgut
Source: PLoS Pathog. 2013 Nov 21;9(11):e1003757. doi: 10.1371/journal.ppat.1003757 (PMC3836724; doi:10.1371/journal.ppat.1003757)
Supplement: Table S1 — Data from direct feeding assays (DFAs) summarized in Table 1 using the three compounds tested in vivo with the Plasmodium berghei /mouse system. Each tab includes data from two replicate experiments for each compound and set of controls, both-pre- and post-injection into P. berghei-infected mice. The tabs are labeled as follows: S1A = VS1 10,000; S1B = VS1 3,000; S1C = VS1 1,000. Data provided include the total number of mosquitoes dissected and scored for oocysts after feeding on a given mouse (N), the number of mosquitoes not infected (# Not Infected), the percent prevalence (Prevalence), the median number of oocysts per midgut (Median), the mean number of oocysts per midgut (Mean), and the percent inhibition (% Inhibition) (for post-injection only, calculated as described in Table 1). (XLSX) [file ppat.1003757.s007.xlsx]

## Sheet: Description
Table S1. Supporting Dataset: A small molecule glycosaminoglycan mimetic blocks Plasmodium invasion of the mosquito midgut.
This file contains data from direct feeding assays (DFAs) summarized in Table 1 using the three compounds tested in vivo with the Plasmodium berghei/mouse system. Each tab includes data from two replicate experiments for each compound and set of controls, both-pre- and post-injection into P. berghei-infected mice. The tabs are labeled as follows: S1A = VS1-10,000; S1B = VS1-3,000; S1C = VS1-1,000…

## Sheet: S1A
Table S1. Supporting Dataset: A small molecule glycosaminoglycan mimetic blocks Plasmodium invasion of the mosquito midgut.
Direct Feeding Assays (DFAs), Anopheles stephensi midgut oocyst intensity (P. berghei ANKA 2.34).
VS1 10,000 Experiments
Replicate 1										Replicate 2
Group:	1: PBS									Group:	1: PBS
	pre-injection				post-injection						pre-injection					post-injection
Mouse #	1.1	1.2	1.3	1.4	1.1	1.2	1.3	1.4		Mouse #	1.1	1.2	1.3	1.4	1.5	1.1	1.2	1.3	1.4	1.5
N	22	30	22	20	21	18	20	22		N	39	39	34	37	35	43	43	37	38	40
# Not Infected	2	5	4	2	2	4	2	2		# Not Infected	3	0	0	2	2	2	2	2	8	0
Prevalence (%)	90.9091	83.3333	81.8182	90	90.4762	77.7778	90	90.9091		Prevalence (%)	92.3077	100	100	94.5946	94.2857	95.3488	95.3488	94.5946	78.9474	100
Median	23.5	40	7.5	121.5	53	4.5	7	256		Median	26	46	99	24	15	7	21	61	4	13
Mean	37.6818	64.4	19.3636	160.9	76.2381	19.6667	25.2	228.409		Mean	73.1026	52.1538	141.412	48.0811	34.4857	50.3953	41.1628	120.081	11.6316	26.75
% Inhibition	N/A	N/A	N/A	N/A	0	88.75	6.66667	0		% Inhibition	N/A	N/A	N/A	N/A	N/A	73.0769	54.3478	38.3838	83.3333	13.3333
Group:	2: PVP									Group:	2: PVP
	pre-injection				post-injection						pre-injection					post-injection
Mouse #	2.1	2.2	2.3	2.4	2.1	2.2	2.3	2.4		Mouse #	2.1	2.2	2.3	2.4	2.5	2.1	2.2	2.3	2.4	2.5
N	25	28	21	31	21	10	19	24		N	36	41	35	42	33	44	39	42	37	37
# Not Infected	0	4	1	0	3	1	2	0		# Not Infected	4	6	5	6	8	3	9	1	0	0
Prevalence (%)	100	85.7143	95.2381	100	85.7143	90	89.4737	100		Prevalence (%)	88.8889	85.3659	85.7143	3	75.7576	93.1818	76.9231	97.619	100	100
Median	68	21	120	121	46	19.5	62	64		Median	3	10	8	37	10	20	3	33.5	26	3
Mean	105.4	99.8929	171.476	189.774	67.5714	37.1	57.7368	90.2917		Mean	24.1111	37.4146	37.4	48.8095	44	27.9545	17.9231	50.9762	58.6216	8.48649
% Inhibition	N/A	N/A	N/A	N/A	32.3529	7.14286	48.3333	47.1074		% Inhibition	N/A	N/A	N/A	N/A	N/A	0	70	0	29.7297	13.3333
Group:	3: VS1-10,000									Group:	3: VS1-10,000
	pre-injection				post-injection						pre-injection					post-injection
Mouse #	3.1	3.2	3.3	3.4	3.1	3.2	3.3	3.4		Mouse #	3.1	3.2	3.3	3.4	3.5	3.1	3.2	3.3	3.4	3.5
N	27	19	20	25	36	32	24	24		N	34	36	43	47	41	47	37	26	45	33
# Not Infected	4	1	2	0	26	6	9	2		# Not Infected	2	9	9	8	15	21	17	9	29	0
Prevalence (%)	85.1852	94.7368	90	100	27.7778	81.25	62.5	91.6667		Prevalence (%)	94.1176	75	79.0698	82.9787	63.4146	55.3191	54.0541	65.3846	35.5556	100
Median	97	185	4	74	0	7	1	5		Median	35	2	2	3	1	1	1	1	0	0
Mean	125.185	250.316	11.95	168.52	0.388889	20.7812	2.08333	14.2083		Mean	61.5882	5.05556	12.6744	30.4894	13.3902	2.89362	1.62162	1.96154	0.622222	0.848485
% Inhibition	N/A	N/A	N/A	N/A	100	96.2162	75	93.2432		% Inhibition	N/A	N/A	N/A	N/A	N/A	97.1429	50	50	100	13.3333

## Sheet: S1B
Table S1. Supporting Dataset: A small molecule glycosaminoglycan mimetic blocks Plasmodium invasion of the mosquito midgut.
Direct Feeding Assays (DFAs), Anopheles stephensi midgut oocyst intensity (P. berghei ANKA 2.34).
VS1 3,000 Experiments
Replicate 1												Replicate 2
Group:	1: PBS											Group:	1: PBS
	pre-injection					post-injection							pre-injection					post-injection
Mouse #	1.1	1.2	1.3	1.4	1.5	1.1	1.2	1.3	1.4	1.5		Mouse #	1.1	1.2	1.3	1.4	1.5	1.1	1.2	1.3	1.4	1.5
N	24	36	36	30	38	38	41	46	37	28		N	34	28	34	27	24	34	35	31	33	28
# Not Infected	6	4	4	2	2	9	4	7	3	2		# Not Infected	1	1	0	5	0	0	1	0	4	2
Prevalence (%)	75	88.8889	88.8889	93.3333	94.7368	76.3158	90.2439	84.7826	91.8919	92.8571		Prevalence (%)	97.0588	96.4286	100	81.4815	100	100	97.1429	100	87.8788	92.8571
Median	6.5	27	11.5	126.5	49	5.5	18	7.5	74	23.5		Median	83.5	63.5	129	16.5	14	153.5	50	119	33	40
Mean	15.3333	70.0556	29.8889	193.267	89.4737	12.5	33.6829	11.9783	116.081	33.5357		Mean	134.559	125.321	146.118	40.2692	32.2917	213.941	136.971	182.581	133.394	46.28
% Inhibition	N/A	N/A	N/A	N/A	N/A	15.3846	33.3333	34.7826	41.502	52.0408		% Inhibition	N/A	N/A	N/A	N/A	N/A	0	21.2598	7.75194	0	0
Group:	2: PVP											Group:	2: PVP
	pre-injection					post-injection							pre-injection					post-injection
Mouse #	2.1	2.2	2.3	2.4	2.5	2.1	2.2	2.3	2.4	2.5		Mouse #	2.1	2.2	2.3	2.4	2.5	2.1	2.2	2.3	2.4	2.5
N	37	39	36	34	40	33	36	30	35	30		N	29	34	35	28	26	37	40	35	32	25
# Not Infected	6	3	3	8	15	2	10	2	2	9		# Not Infected	2	1	0	1	0	1	2	1	1	9
Prevalence (%)	83.7838	92.3077	91.6667	76.4706	62.5	94	72	93	94	70		Prevalence (%)	93.1034	97.0588	100	96.4286	100	97.2973	95	97.1429	96.875	64
Median	20	9	53.5	6	3	8	1.5	27	19	2		Median	191	62	36	25	90.5	41	13.5	21	13	68
Mean	39.3784	21.7949	104.889	25.6471	16	17.2	6.9	37.4	29.3	4.6		Mean	221.241	96.9118	65.1143	79.6071	99.6154	62.1351	38.1	56.3143	42.4375	116.16
% Inhibition	N/A	N/A	N/A	N/A	N/A	60	83.3	49.5	0	33.3		% Inhibition	N/A	N/A	N/A	N/A	N/A	78.534	78.2258	41.6667	48	24.8619
Group:	3: VS1-3,000											Group:	3: VS1-3,000
	pre-injection					post-injection							pre-injection					post-injection
Mouse #	3.1	3.2	3.3	3.4	3.5	3.1	3.2	3.3	3.4	3.5		Mouse #	3.1	3.2	3.3	3.4	3.5	3.1	3.2	3.3	3.4	3.5
N	37	29	39	37	40	27	33	36	31	26		N	35	30	33	34	32	37	34	33	28	32
# Not Infected	2	1	3	5	2	7	15	30	22	20		# Not Infected	3	0	2	0	1	24	9	18	13	11
Prevalence (%)	94.5946	96.5517	92.3077	86.4865	95	74.0741	54.5455	16.6667	29.0323	23.0769		Prevalence (%)	91.4286	100	93.9394	100	96.875	35.1351	73.5294	45.4545	53.5714	65.625
Median	73	20	41	17	30	1	1	0	0	0		Median	19	76.5	21	32.5	89	0	3	0	1	1
Mean	97.5405	52.4483	98.4615	36.3243	56.625	1.74074	0.757576	0.166667	0.483871	0.307692		Mean	48.1429	148.367	59.9091	92.1765	127.219	0.72973	9.76471	0.757576	2	3
% Inhibition	N/A	N/A	N/A	N/A	N/A	98.6301	95	100	100	100		% Inhibition	N/A	N/A	N/A	N/A	N/A	100	96.0784	100	96.9231	98.8764

## Sheet: S1C
Table S1. Supporting Dataset: A small molecule glycosaminoglycan mimetic blocks Plasmodium invasion of the mosquito midgut.
Direct Feeding Assays (DFAs), Anopheles stephensi midgut oocyst intensity (P. berghei ANKA 2.34).
VS1 1,000 Experiments
Replicate 1										Replicate 2
Group:	1: PBS									Group:	1: PBS
	pre-injection				post-injection						pre-injection				post-injection
Mouse #	1.1	1.2	1.3	1.4	1.1	1.2	1.3*	1.4		Mouse #	1.1	1.2	1.3	1.4	1.1	1.2	1.3	1.4
N	31	41	43	40	31	40		43		N	27	29	33	54	36	15	34	43
# Not Infected	8	4	7	2	1	7		3		# Not Infected	1	3	0	1	1	7	0	2
Prevalence (%)	74.1935	90.2439	83.7209	95	96.7742	82.5		93.0233		Prevalence (%)	96.2963	89.6552	100	98.1481	97.2222	82.5	100	95.3488
Median	6.5	9	4	47.5	7	6.5		24		Median	45	27	44	48.5	56.5	1	221	45
Mean	12.1591	14.9756	43.6047	91.525	11.0645	11.375		34.7209		Mean	90.2222	84.4483	107.667	87.0185	92.9722	5.26667	285.324	51.4545
% Inhibition	N/A	N/A	N/A	N/A	0	27.7778		49.4737		% Inhibition	N/A	N/A	N/A	N/A	0	96.2963	0	7.21649
*Mouse died during post-injection feeding
Group:	2: PVP									Group:	2: PVP
	pre-injection				post-injection						pre-injection					post-injection
Mouse #	2.1	2.2	2.3	2.4	2.1	2.2	2.3	2.4		Mouse #	2.1	2.2	2.3	2.4	2.5	2.1	2.2	2.3	2.4	2.5
N	34	37	41	38	31	35	31	34		N	32	40	24	28	38	34	24	22	25	30
# Not Infected	6	3	3	8	2	10	2	2		# Not Infected	13	18	0	11	2	1	13	0	6	1
Prevalence (%)	82.3529	91.8919	92.6829	78.9474	93.5484	71.4286	93.5484	94.1176		Prevalence (%)	59.375	55	100	60.7143	94.7368	97.0588	45.8333	100	76	96.6667
Median	3	31	12	20	5	13	8	27		Median	1	1	193.5	2	78	119	0	181.5	5	67.5
Mean	13.7647	56.1892	37.1463	35.5263	6.12903	21.0571	12.7742	37.7941		Mean	20.7188	13.525	266.583	18.6071	117.421	144.176	2.375	252.909	49.28	138.233
% Inhibition	N/A	N/A	N/A	N/A	0	58.0645	33.3333	0		% Inhibition	N/A	N/A	N/A	N/A	N/A	0	100	6.20155	0	13.4615
Group:	3: VS1-1,000									Group:	3: VS1-1,000
	pre-injection				post-injection						pre-injection					post-injection
Mouse #	3.1	3.2	3.3	3.4	3.1	3.2	3.3	3.4		Mouse #	3.1	3.2	3.3	3.4	3.5	3.1	3.2	3.3	3.4	3.5
N	42	34	38	38	36	32	42	35		N	27	32	32	29	22	31	25	32	26	25
# Not Infected	2	1	3	5	7	15	30	22		# Not Infected	3	0	0	1	0	2	6	8	6	16
Prevalence (%)	95.2381	97.0588	92.1053	86.8421	80.5556	53.125	28.5714	37.1429		Prevalence (%)	88.8889	100	100	96.5517	100	94	76	75	77	36
Median	11.5	18.5	20.5	8	1	1	1	1		Median	37	139	76.5	82	81	22	2	2	4	0
Mean	44.4524	28.0882	66.4211	26.3158	3.38889	4.8125	4.04762	2.85714		Mean	87.1481	160.375	127.938	139.966	136.909	35.2	6.4	15.7	18.5	3
% Inhibition	N/A	N/A	N/A	N/A	91.3043	94.5946	95.122	87.5		% Inhibition	N/A	N/A	N/A	N/A	N/A	40.5	98.6	97.4	95.1	100
